# Supplementary material
Source: HighWire-hosted journal article supplement (https://www.cancerbiomed.org/content/19/11/1586)
Supplement: media-1 [file media-1.pdf]

## Supplementary materials

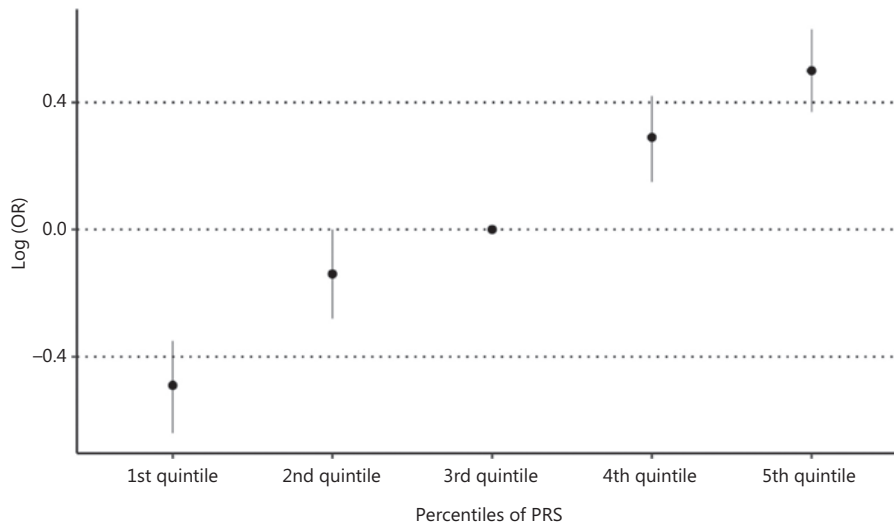

**Figure S1** Log odds ratio of colorectal cancer risk according to polygenic risk score level. OR, odds ratio; PRS, polygenic risk score.

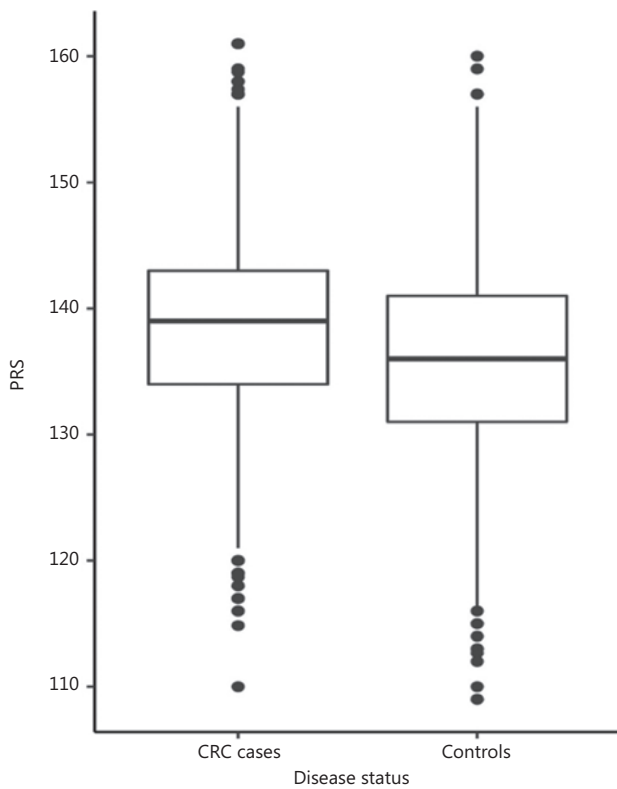

**Figure S2** Boxplot of polygenic risk scores among colorectal cancer cases and controls. CRC, colorectal cancer; PRS, polygenic risk score.

**Table S1** Composition and points for the diet quality score, on the basis of responses from the DACHS study food frequency questionnaire

| Food groups                         | Food frequency questionnaire responses |              |                         |               |                         |       | Total maximum |
|-------------------------------------|----------------------------------------|--------------|-------------------------|---------------|-------------------------|-------|---------------|
|                                     | Multiple times per day                 | Once per day | Multiple times per week | Once per week | Less than once per week | Never |               |
| Red and processed meat <sup>1</sup> | 0                                      | 1            | 2                       | 3             | 4                       | 5     | 5             |
| Fish                                | 5                                      | 4            | 3                       | 2             | 1                       | 0     | 5             |
| Whole grains <sup>2</sup>           | 10                                     | 8            | 6                       | 4             | 2                       | 0     | 10            |
| Dairy foods <sup>3</sup>            | 10                                     | 8            | 6                       | 4             | 2                       | 0     | 10            |
| Fruit                               | 10                                     | 8            | 6                       | 4             | 2                       | 0     | 10            |
| Vegetables/salad                    | 10                                     | 8            | 6                       | 4             | 2                       | 0     | 10            |
|                                     |                                        |              |                         |               |                         |       | 50            |

Note: This table was developed by Carr et al. (PMID: 30201362; PMID: 32179093). <sup>1</sup>Red and processed meat: fresh pork, beef, etc., sausages made from beef or pork, luncheon meats (e.g., salami/sliced sausage), or ham. <sup>2</sup>Whole grains and whole grain products: e.g., whole grain bread, muesli, or other whole grain products. <sup>3</sup>Dairy foods: cheese or quark, yogurt, or milk.

**Table S2** Description of the individual lifestyle factors comprising the healthy lifestyle score

| Lifestyle factor    | Points | Description                                                                        |
|---------------------|--------|------------------------------------------------------------------------------------|
| Smoking             | 0      | Smoking: current smoker or former smoker ( $\geq 30$ pack years)                   |
|                     | 1      | Non-smoking: never smoker or former smoker ( $< 30$ pack years)                    |
| Alcohol consumption | 0      | Did not meet recommendations on alcoholic drinks <sup>1</sup>                      |
|                     | 1      | Met recommendation on alcoholic drinks <sup>1</sup>                                |
| Diet quality        | 0      | Unhealthy diet quality: diet score <sup>2</sup> $<$ diet score in the highest 40%  |
|                     | 1      | Healthy diet quality: diet score <sup>2</sup> $\geq$ diet score in the highest 40% |
| Physical activity   | 0      | Did not meet physical activity guidelines <sup>3</sup>                             |
|                     | 1      | Met physical activity guidelines <sup>3</sup>                                      |
| Body mass index     | 0      | Overweight or obese (BMI $\geq 25$ kg/m <sup>2</sup> )                             |
|                     | 1      | Healthy weight (18.5 $<$ BMI $<$ 25 kg/m <sup>2</sup> )                            |

Note: This table was developed by Carr et al. (PMID: 30201362; PMID: 32179093). <sup>1</sup>World Cancer Research Fund/American Institute for Cancer Research (WCRF/AICR) (2007) Recommendation on alcoholic drinks:  $\leq 24$  g/day for men and  $\leq 12$  g/day for women. <sup>2</sup>Calculated on the basis of data from the Food Frequency Questionnaires according to the updated evidence from the 2017 WCRF/AICR diet recommendations for CRC prevention. <sup>3</sup>The World Health Organization Global Recommendations on Physical Activity for Health (2010) recommend that adults engage in at least 150 min of moderate-intensity or 75 min of vigorous-intensity aerobic physical activity throughout the week, or an equivalent combination of moderate and vigorous intensity physical activity (at least  $\sim 500$  MET minutes). BMI, body mass index.

**Table S3** Information on genotyping and imputation

| Genotyping platform             | CRC cases (n) | Controls (n) | Recruitment Period | Imputation                                         |
|---------------------------------|---------------|--------------|--------------------|----------------------------------------------------|
| Illumina HumanCytoSNP           | 1,588         | 1640         | 2003–2008          |                                                    |
| Illumina HumanOmniExpress       | 649           | 473          | 2007–2010          |                                                    |
| Illumina HumanOmniExpress       | 1,128         | 596          | 2010–2015          | Haplotype Reference Consortium (version r1.1.2016) |
| Illumina Infinium OncoArray     | 858           | 626          | 2003–2016          |                                                    |
| Illumina Global Screening Array | 621           | 629          | 2016–2017          |                                                    |

Note: We excluded triallelic SNPs, genotyped SNPs that had a low call rate (< 98%), lack of Hardy-Weinberg equilibrium in control individuals ( $P < 1 \times 10^{-4}$ ), or low minor allele frequency (< 0.1%), and those not assigned an rs number. More details can be found in previous studies by Peters et al.<sup>1</sup> and Schumacher et al.<sup>2</sup>. <sup>1</sup>Peters U, Jiao S, Schumacher FR, et al. Identification of genetic susceptibility loci for colorectal tumors in a genome-wide meta-analysis. *Gastroenterology* 2013; 144:799–807. <sup>2</sup>Schumacher FR, Schmit SL, Jiao S, et al. Genome-wide association study of colorectal cancer identifies 6 new susceptibility loci. *Nat Commun* 2015; 6:7138.

**Table S4** Overview of colorectal cancer related single-nucleotide polymorphisms identified in genome-wide association studies and considered in this analysis

| SNP         | Locus   | Position  | Risk allele | Beta   |
|-------------|---------|-----------|-------------|--------|
| rs4360494   | 1p34.3  | 38455891  | G           | 0.0379 |
| rs12144319  | 1p32.3  | 55246035  | C           | 0.0661 |
| rs72647484  | 1p36.12 | 22587728  | T           | 0.0504 |
| rs7542665   | 1p31.3  | 62673037  | C           | 0.0334 |
| rs6678517   | 1q25.3  | 183002639 | A           | 0.073  |
| rs17011141  | 1q41    | 222112634 | G           | 0.0877 |
| rs448513    | 2q24.2  | 159964552 | C           | 0.0054 |
| rs11884596  | 2q33.1  | 199612407 | C           | 0.0342 |
| rs983402    | 2q33.1  | 199781586 | T           | 0.0622 |
| rs7606562   | 2p16.3  | 48686695  | T           | 0.0414 |
| rs11692435  | 2q11.2  | 98275354  | G           | 0.0492 |
| rs3731861   | 2q35    | 219191256 | T           | 0.0613 |
| rs10049390  | 3q22.2  | 133701119 | A           | 0.0455 |
| rs13086367  | 3q13.2  | 112903888 | A           | 0.0463 |
| rs72942485  | 3q13.2  | 112999560 | G           | 0.0545 |
| rs9831861   | 3p21.1  | 53088285  | G           | 0.0294 |
| rs35470271  | 3p22.1  | 40915239  | G           | 0.0994 |
| rs12635946  | 3q13.2  | 112916918 | C           | 0.0334 |
| rs113569514 | 3q22.2  | 133748789 | T           | 0.0414 |
| rs9876206   | 3q26.2  | 169517436 | C           | 0.0453 |
| rs6781752   | 3p14.1  | 66365163  | A           | 0.0597 |
| rs11727676  | 4q31.21 | 145659064 | C           | 0.0093 |
| rs1391441   | 4q24    | 106128760 | A           | 0.0148 |

**Table S4** Continued

| SNP                    | Locus   | Position  | Risk allele | Beta   |
|------------------------|---------|-----------|-------------|--------|
| rs13149359             | 4q22.2  | 94938618  | A           | 0.052  |
| rs7708610              | 5p13.1  | 40102443  | A           | 0.0384 |
| rs78368589             | 5p15.33 | 1240204   | T           | 0.0786 |
| rs145364999            | 5q21.1  | 98206082  | T           | 0.3496 |
| rs2735940              | 5p15.33 | 1296486   | G           | 0.0865 |
| rs12514517             | 5p13.1  | 40280076  | A           | 0.1013 |
| rs755229494            | 5q22.2  | 112097351 | G           | 0.6286 |
| rs12659017             | 5q23.2  | 125988175 | G           | 0.0374 |
| rs4976270              | 5q31.1  | 134467220 | C           | 0.0693 |
| rs13204733             | 6p12.1  | 55566108  | G           | 0.0643 |
| rs116685461            | 6p21.33 | 31315512  | G           | 0.0655 |
| rs9271695              | 6p21.32 | 32593080  | G           | 0.0889 |
| rs2516420              | 6p21.33 | 31449620  | C           | 0.1091 |
| rs116353863            | 6p21.33 | 31010185  | C           | 0.1202 |
| rs16878812             | 6p21.31 | 35569562  | A           | 0.0778 |
| rs9470361              | 6p21.2  | 36623379  | A           | 0.054  |
| rs62404966             | 6p12.1  | 55712124  | C           | 0.0724 |
| rs3131043              | 6p21.33 | 30758466  | G           | 0.0294 |
| rs2070699              | 6p24.1  | 12292772  | T           | 0.0294 |
| rs1476570              | 6p22.1  | 29809860  | A           | 0.0492 |
| rs3830041              | 6p21.32 | 32191339  | T           | 0.0645 |
| rs6928864 <sup>1</sup> | 6q21    | 105966894 | C           | 0.0531 |
| rs62396735             | 6p21.1  | 41702582  | C           | 0.033  |
| rs12672022             | 7p13    | 45136423  | T           | 0.0067 |

Table S4 Continued

| SNP         | Locus    | Position  | Risk allele | Beta   |
|-------------|----------|-----------|-------------|--------|
| rs80077929  | 7p12.3   | 46094089  | T           | 0.0093 |
| rs10951878  | 7p12.3   | 46926695  | C           | 0.0531 |
| rs3801081   | 7p12.3   | 47511161  | G           | 0.0253 |
| rs7013278   | 8q24.21  | 128414892 | T           | 0.0091 |
| rs4313119   | 8q24.21  | 128571855 | G           | 0.0518 |
| rs16892766  | 8q23.3   | 117630683 | C           | 0.2099 |
| rs6469654   | 8q23.3   | 117632965 | G           | 0.0677 |
| rs117079142 | 8q24.11  | 117790914 | A           | 0.1139 |
| rs6983267   | 8q24.21  | 128413305 | G           | 0.1052 |
| rs34405347  | 9q22.33  | 101679752 | T           | 0.0089 |
| rs1537372   | 9p21.3   | 22103183  | G           | 0.012  |
| rs10980628  | 9q31.3   | 113671403 | C           | 0.0511 |
| rs12217641  | 10p14    | 8663875   | C           | 0.0069 |
| rs10786560  | 10q24.2  | 101315166 | G           | 0.0082 |
| rs1250567   | 10q22.3  | 81046265  | C           | 0.047  |
| rs11255841  | 10p14    | 8739580   | T           | 0.1064 |
| rs10821907  | 10q11.23 | 52648454  | C           | 0.073  |
| rs704017    | 10q22.3  | 80819132  | G           | 0.0765 |
| rs11190164  | 10q24.2  | 101351704 | G           | 0.0889 |
| rs12246635  | 10q25.2  | 114288619 | C           | 0.0975 |
| rs11196170  | 10q25.2  | 114722621 | A           | 0.0527 |
| rs7946853   | 11q13.4  | 74409077  | C           | 0.0119 |
| rs55864876  | 11q22.1  | 100717136 | G           | 0.015  |
| rs2186607   | 11q22.1  | 101656397 | T           | 0.0483 |
| rs61389091  | 11q13.4  | 74427921  | C           | 0.1934 |
| rs4450168   | 11p15.4  | 10286755  | C           | 0.0413 |
| rs174533    | 11q12.2  | 61549025  | G           | 0.0636 |
| rs7121958   | 11q13.4  | 74280012  | G           | 0.078  |
| rs3087967   | 11q23.1  | 111156836 | T           | 0.1122 |
| rs4759277   | 12q13.3  | 57533690  | A           | 0.0285 |
| rs1427760   | 12q24.21 | 115100714 | C           | 0.0424 |
| rs3217874   | 12p13.32 | 4400808   | T           | 0.0453 |
| rs10849433  | 12p13.31 | 6406904   | C           | 0.0468 |
| rs11610543  | 12q12    | 43134191  | G           | 0.0474 |
| rs35808169  | 12p13.32 | 4368607   | C           | 0.089  |

Table S4 Continued

| SNP         | Locus    | Position  | Risk allele | Beta   |
|-------------|----------|-----------|-------------|--------|
| rs3217810   | 12p13.32 | 4388271   | T           | 0.1181 |
| rs2250430   | 12p13.31 | 6421174   | T           | 0.0597 |
| rs77969132  | 12p11.21 | 31594813  | T           | 0.1583 |
| rs12372718  | 12q13.12 | 51171090  | G           | 0.0896 |
| rs597808    | 12q24.12 | 111973358 | G           | 0.0737 |
| rs7300312   | 12q24.21 | 115890922 | C           | 0.066  |
| rs2710310   | 12p13.2  | 12035649  | C           | 0.0145 |
| rs78341008  | 13q22.1  | 73791554  | C           | 0.0109 |
| rs8000189   | 13q34    | 111075881 | T           | 0.0473 |
| rs45597035  | 13q22.1  | 73649152  | A           | 0.0495 |
| rs1924816   | 13q22.1  | 73997961  | A           | 0.0506 |
| rs7333607   | 13q13.3  | 37462010  | G           | 0.0758 |
| rs1330889   | 13q22.3  | 78609615  | C           | 0.0453 |
| rs377429877 | 13q13.2  | 34092164  | C           | 0.0468 |
| rs1951864   | 14q22.2  | 54369299  | A           | 0.0059 |
| rs17094983  | 14q23.1  | 59189361  | G           | 0.0062 |
| rs8020436   | 14q23.1  | 59208437  | A           | 0.0294 |
| rs35107139  | 14q22.2  | 54419106  | C           | 0.0912 |
| rs4901473   | 14q22.2  | 54445157  | G           | 0.0465 |
| rs745213    | 15q23    | 68060389  | G           | 0.0072 |
| rs12594720  | 15q22.31 | 67007018  | C           | 0.0246 |
| rs56324967  | 15q22.33 | 67402824  | C           | 0.0689 |
| rs17816465  | 15q13.3  | 33156386  | A           | 0.069  |
| rs12708491  | 15q13.3  | 32992836  | G           | 0.0464 |
| rs2293581   | 15q13.3  | 33010736  | A           | 0.1248 |
| rs7495132   | 15q26.1  | 91172901  | T           | 0.0453 |
| rs9930005   | 16q23.2  | 80043258  | C           | 0.0061 |
| rs12447408  | 16q24.1  | 86252544  | A           | 0.0079 |
| rs9924886   | 16q22.1  | 68743939  | A           | 0.055  |
| rs12149163  | 16q24.1  | 86339315  | T           | 0.0487 |
| rs62042090  | 16q24.1  | 86703949  | T           | 0.0481 |
| rs983318    | 17q24.3  | 70413253  | A           | 0.0397 |
| rs73975586  | 17p13.3  | 814243    | A           | 0.0497 |
| rs1078643   | 17p12    | 10707241  | A           | 0.0747 |
| rs75954926  | 17q25.3  | 81061048  | G           | 0.0882 |

**Table S4** Continued

| SNP         | Locus    | Position | Risk allele | Beta   |
|-------------|----------|----------|-------------|--------|
| rs373585858 | 17q25.3  | 80394556 | A           | 0.1103 |
| rs4968127   | 17p13.3  | 809643   | G           | 0.0514 |
| rs11874392  | 18q21.1  | 46453156 | A           | 0.1606 |
| rs73068325  | 19q13.43 | 59079096 | T           | 0.0066 |
| rs34797592  | 19p13.11 | 16417198 | T           | 0.0824 |
| rs28840750  | 19q13.11 | 33519927 | T           | 0.1939 |
| rs1963413   | 19q13.2  | 41871573 | A           | 0.0441 |
| rs12979278  | 19q13.33 | 49218602 | T           | 0.0293 |
| rs2738783   | 20q13.33 | 62308612 | T           | 0.006  |
| rs6067417   | 20q13.13 | 48983697 | C           | 0.0331 |
| rs6031311   | 20q13.12 | 42666475 | T           | 0.0362 |
| rs6091189   | 20q13.13 | 49256285 | T           | 0.0549 |
| rs994308    | 20p12.3  | 6603622  | C           | 0.0626 |
| rs28488     | 20p12.3  | 6762221  | T           | 0.0714 |
| rs556532366 | 20p12.3  | 8568071  | T           | 0.0715 |
| rs189583    | 20p12.3  | 6376457  | G           | 0.0795 |
| rs4813802   | 20p12.3  | 6699595  | G           | 0.0819 |
| rs11087784  | 20p12.3  | 7740976  | G           | 0.0874 |
| rs6066825   | 20q13.13 | 47340117 | A           | 0.0719 |
| rs6063514   | 20q13.13 | 49055318 | C           | 0.0547 |
| rs13831     | 20q13.32 | 57475191 | G           | 0.0334 |
| rs1741640   | 20q13.33 | 60932414 | C           | 0.1146 |
| rs6058093   | 20q11.22 | 33213196 | C           | 0.045  |

<sup>1</sup>For building the PRS, the missing reference SNP was replaced by rs6904092 (linkage disequilibrium,  $D' = 1$  and  $r^2 = 1$ ). A, adenine; C, cytosine; G, guanine; OR, odds ratio; T, thymine; SNP, single-nucleotide polymorphism.

**Table S5** Association of unweighted and weighted polygenic risk score with colorectal cancer risk

| PRS            | PRS decile | CRC cases, <i>n</i> (%) | Controls, <i>n</i> (%) | OR (95% CI) <sup>1</sup> | OR (95% CI) <sup>2</sup> |
|----------------|------------|-------------------------|------------------------|--------------------------|--------------------------|
| Unweighted PRS | D1         | 215 (4.5)               | 395 (10.0)             | Ref.                     | Ref.                     |
|                | D2         | 326 (6.8)               | 399 (10.1)             | 1.44 (1.13, 1.83)        | 1.44 (1.14, 1.84)        |
|                | D3         | 334 (6.9)               | 390 (9.9)              | 1.63 (1.28, 2.07)        | 1.64 (1.29, 2.08)        |
|                | D4         | 435 (9.0)               | 399 (10.1)             | 2.01 (1.60, 2.54)        | 2.02 (1.60, 2.55)        |
|                | D5         | 372 (7.7)               | 395 (10.0)             | 1.92 (1.52, 2.44)        | 1.93 (1.52, 2.44)        |
|                | D6         | 502 (10.4)              | 387 (9.8)              | 2.31 (1.84, 2.91)        | 2.33 (1.85, 2.94)        |
|                | D7         | 604 (12.5)              | 395 (10.0)             | 2.79 (2.23, 3.51)        | 2.82 (2.25, 3.55)        |
|                | D8         | 571 (11.9)              | 395 (10.0)             | 2.74 (2.18, 3.44)        | 2.76 (2.20, 3.47)        |
|                | D9         | 617 (12.8)              | 392 (9.9)              | 2.87 (2.29, 3.60)        | 2.87 (2.29, 3.60)        |
|                | D10        | 838 (17.4)              | 394 (10.0)             | 3.91 (3.14, 4.89)        | 3.93 (3.15, 4.91)        |
| Weighted PRS   | D1         | 228 (4.7)               | 395 (10.0)             | Ref.                     | Ref.                     |
|                | D2         | 291 (6.0)               | 394 (10.0)             | 1.32 (1.03, 1.68)        | 1.31 (1.03, 1.67)        |
|                | D3         | 327 (6.8)               | 394 (10.0)             | 1.52 (1.20, 1.93)        | 1.52 (1.20, 1.93)        |
|                | D4         | 397 (8.2)               | 394 (10.0)             | 1.85 (1.47, 2.34)        | 1.85 (1.47, 2.33)        |
|                | D5         | 433 (9.0)               | 394 (10.0)             | 2.07 (1.64, 2.61)        | 2.06 (1.63, 2.59)        |
|                | D6         | 492 (10.2)              | 394 (10.0)             | 2.26 (1.80, 2.84)        | 2.26 (1.80, 2.84)        |
|                | D7         | 530 (11.0)              | 394 (10.0)             | 2.50 (1.99, 3.14)        | 2.52 (2.01, 3.16)        |
|                | D8         | 578 (12.0)              | 394 (10.0)             | 2.64 (2.11, 3.31)        | 2.64 (2.11, 3.31)        |
|                | D9         | 681 (14.1)              | 394 (10.0)             | 3.17 (2.54, 3.96)        | 3.19 (2.55, 3.98)        |
|                | D10        | 857 (17.8)              | 394 (10.0)             | 3.89 (3.13, 4.85)        | 3.89 (3.12, 4.84)        |

<sup>1</sup>Adjusted for smoking, alcohol intake, diet quality, physical activity, body mass index, age, gender, education, family history of CRC, history of colonoscopy, participation in routine health check-ups, and use of nonsteroidal anti-inflammatory drugs. <sup>2</sup>Adjusted for healthy lifestyle score, age, gender, education, family history of CRC, history of colonoscopy, participation in routine health check-ups, and use of nonsteroidal anti-inflammatory drugs. CI, confidence interval; CRC, colorectal cancer; D, decile of PRS among controls; OR, odds ratio; PRS, polygenic risk score; Ref., reference.

**Table S6** Frequency of the healthy lifestyle factors and agreement among the various healthy lifestyle factors in cases and controls

| Healthy lifestyle factor | CRC cases ( <i>n</i> = 4,844) |                   |      |       |       | Controls ( <i>n</i> = 3,964) |              |                   |      |       |        |        |
|--------------------------|-------------------------------|-------------------|------|-------|-------|------------------------------|--------------|-------------------|------|-------|--------|--------|
|                          | <i>n</i> (%)                  | Kappa coefficient |      |       |       |                              | <i>n</i> (%) | Kappa coefficient |      |       |        |        |
|                          |                               | SMK               | ALC  | DQ    | PA    | BMI                          |              | SMK               | ALC  | DQ    | PA     | BMI    |
| SMK                      | 3,763 (77.7)                  | 1.00              | 0.13 | 0.085 | 0.035 | -0.027                       | 3,258 (82.2) | 1.00              | 0.12 | 0.092 | 0.052  | -0.018 |
| ALC                      | 3,571 (73.7)                  |                   | 1.00 | 0.050 | 0.010 | 0.034                        | 3,051 (77.0) |                   | 1.00 | 0.057 | -0.012 | 0.044  |
| DQ                       | 1,632 (33.7)                  |                   |      | 1.00  | 0.044 | 0.079                        | 1,813 (45.7) |                   |      | 1.00  | 0.059  | 0.097  |
| PA                       | 4,084 (84.3)                  |                   |      |       | 1.00  | 0.040                        | 3,474 (87.6) |                   |      |       | 1.00   | 0.033  |
| BMI                      | 1,441 (29.7)                  |                   |      |       |       | 1.00                         | 1,504 (37.9) |                   |      |       |        | 1.00   |

Note: All healthy lifestyle factors were categorized into 2 subgroups according to pertinent health guidelines. ALC, alcohol intake; BMI, body mass index; CRC, colorectal cancer; DQ, diet quality; PA, physical activity; SMK, smoking.

**Table S7** Associations of the healthy lifestyle score with colorectal cancer risk by polygenic risk score level

| PRS <sup>1</sup> | Healthy lifestyle score | CRC cases, <i>n</i> (%) | Controls, <i>n</i> (%) | OR (95% CI) <sup>2</sup> |
|------------------|-------------------------|-------------------------|------------------------|--------------------------|
| Low              | 0–2                     | 313 (30.5)              | 264 (20.0)             | Ref.                     |
|                  | 3                       | 374 (36.5)              | 457 (34.7)             | 0.70 (0.55, 0.88)        |
|                  | 4                       | 273 (26.6)              | 406 (30.8)             | 0.58 (0.45, 0.74)        |
|                  | 5                       | 66 (6.4)                | 190 (14.4)             | 0.30 (0.21, 0.43)        |
|                  | Per 1-point increase    |                         |                        | 0.73 (0.67, 0.80)        |
| Moderate         | 0–2                     | 479 (31.0)              | 301 (22.9)             | Ref.                     |
|                  | 3                       | 564 (36.5)              | 455 (34.7)             | 0.82 (0.66, 1.00)        |
|                  | 4                       | 395 (25.6)              | 380 (28.9)             | 0.67 (0.54, 0.84)        |
|                  | 5                       | 106 (6.9)               | 177 (13.5)             | 0.43 (0.32, 0.59)        |
|                  | Per 1-point increase    |                         |                        | 0.80 (0.74, 0.87)        |
| High             | 0–2                     | 727 (32.4)              | 311 (23.7)             | Ref.                     |
|                  | 3                       | 777 (34.6)              | 425 (32.4)             | 0.79 (0.65, 0.96)        |
|                  | 4                       | 565 (25.2)              | 389 (29.7)             | 0.62 (0.50, 0.76)        |
|                  | 5                       | 175 (7.8)               | 186 (14.2)             | 0.39 (0.30, 0.52)        |
|                  | Per 1-point increase    |                         |                        | 0.78 (0.73, 0.84)        |

<sup>1</sup>PRS was categorized into low, moderate, and high levels according to tertiles of PRS among controls. <sup>2</sup>Adjusted for age, gender, school education, family history of CRC, history of colonoscopy, participation in routine health check-ups, and use of nonsteroidal anti-inflammatory drugs, with healthy lifestyle score  $\leq 2$  points as the reference in each PRS subgroup. CI, confidence intervals; CRC, colorectal cancer; OR, odds ratio; PRS, polygenic risk score; Ref., reference.

**Table S8** Association of the healthy lifestyle score with colorectal cancer risk, stratified by age and gender

| Variables                             | CRC cases, <i>n</i> (%) | Controls, <i>n</i> (%) | OR (95% CI) <sup>1</sup> | GRE (95% CI)          | <i>P</i> -interaction <sup>2</sup> |
|---------------------------------------|-------------------------|------------------------|--------------------------|-----------------------|------------------------------------|
| <b>Age &lt; 55 years</b>              |                         |                        |                          |                       | 0.083                              |
| Healthy lifestyle score               |                         |                        |                          |                       |                                    |
| 0–2                                   | 158 (29.1)              | 78 (19.6)              | Ref.                     | Ref.                  |                                    |
| 3                                     | 203 (37.4)              | 116 (29.1)             | 0.96 (0.65, 1.40)        | –3.3 (–34.6, 27.9)    |                                    |
| 4                                     | 128 (23.6)              | 127 (31.9)             | 0.51 (0.34, 0.77)        | –55.1 (–95.2, –15.0)  |                                    |
| 5                                     | 54 (9.9)                | 77 (19.3)              | 0.38 (0.23, 0.63)        | –79.2 (–131.1, –27.2) |                                    |
| Per 1-point increase                  |                         |                        | 0.73 (0.64, 0.84)        | –25.8 (–41.2, –10.3)  |                                    |
| PRS (per 10 percentile increase)      |                         |                        | 1.13 (1.07, 1.18)        |                       |                                    |
| <b>Age <math>\geq 55</math> years</b> |                         |                        |                          |                       |                                    |
| Healthy lifestyle score               |                         |                        |                          |                       |                                    |
| 0–2                                   | 1,361 (31.9)            | 798 (22.5)             | Ref.                     | Ref.                  |                                    |
| 3                                     | 1,512 (35.4)            | 1,221 (34.5)           | 0.77 (0.68, 0.88)        | –21.4 (–32.3, –10.4)  |                                    |
| 4                                     | 1,105 (25.9)            | 1,048 (29.6)           | 0.66 (0.57, 0.75)        | –34.0 (–46.3, –21.7)  |                                    |
| 5                                     | 293 (6.9)               | 476 (13.4)             | 0.39 (0.32, 0.47)        | –77.0 (–96.2, –57.9)  |                                    |
| Per 1-point increase                  |                         |                        | 0.79 (0.75, 0.83)        | –19.3 (–24.1, –14.4)  |                                    |
| PRS (per 10 percentile increase)      |                         |                        | 1.13 (1.11, 1.15)        |                       |                                    |

Table S8 Continued

| Variables                        | CRC cases, <i>n</i> (%) | Controls, <i>n</i> (%) | OR (95% CI) <sup>1</sup> | GRE (95% CI)          | <i>P</i> -interaction <sup>2</sup> |
|----------------------------------|-------------------------|------------------------|--------------------------|-----------------------|------------------------------------|
| <b>Female</b>                    |                         |                        |                          |                       | 0.80                               |
| Healthy lifestyle score          |                         |                        |                          |                       |                                    |
| 0–2                              | 365 (19.4)              | 177 (11.7)             | Ref.                     | Ref.                  |                                    |
| 3                                | 649 (34.5)              | 457 (30.2)             | 0.71 (0.56, 0.90)        | –28.0 (–48.1, –8.0)   |                                    |
| 4                                | 641 (34.1)              | 551 (36.5)             | 0.58 (0.46, 0.73)        | –44.6 (–65.8, –23.3)  |                                    |
| 5                                | 227 (12.1)              | 326 (21.6)             | 0.36 (0.28, 0.48)        | –83.6 (–111.9, –55.3) |                                    |
| Per 1-point increase             |                         |                        | 0.75 (0.69, 0.81)        | –23.5 (–31.6, –15.5)  |                                    |
| PRS (per 10 percentile increase) |                         |                        | 1.13 (1.10, 1.16)        |                       |                                    |
| <b>Male</b>                      |                         |                        |                          |                       |                                    |
| Healthy lifestyle score          |                         |                        |                          |                       |                                    |
| 0–2                              | 1,154 (39.4)            | 699 (28.8)             | Ref.                     | Ref.                  |                                    |
| 3                                | 1,066 (36.4)            | 880 (36.2)             | 0.81 (0.70, 0.93)        | –17.2 (–29.4, –5.1)   |                                    |
| 4                                | 592 (20.2)              | 624 (25.7)             | 0.66 (0.56, 0.78)        | –34.0 (–48.6, –19.4)  |                                    |
| 5                                | 120 (4.1)               | 227 (9.3)              | 0.38 (0.29, 0.50)        | –79.2 (–104.8, –53.5) |                                    |
| Per 1-point increase             |                         |                        | 0.80 (0.75, 0.84)        | –18.3 (–23.9, –12.6)  |                                    |
| PRS (per 10 percentile increase) |                         |                        | 1.13 (1.11, 1.16)        |                       |                                    |

<sup>1</sup>Variables in the model included the healthy lifestyle score, age, gender, education, family history of CRC, history of colonoscopy, participation in routine health check-ups, use of nonsteroidal anti-inflammatory drugs, and PRS (per 10 percentiles, continuous) but without the stratification factors. <sup>2</sup>Interactions were tested by inclusion of a cross-product term of the healthy lifestyle score (categorical variable) and stratification factors in the models. CI, confidence intervals; CRC, colorectal cancer; GRE, genetic risk equivalent; OR, odds ratio; PRS, polygenic risk score; Ref., reference.

**Table S9** Associations of the healthy lifestyle score with CRC risk, stratified by history of colonoscopy, use of NSAIDs, and family history of CRC

| Healthy lifestyle score            | CRC cases, <i>n</i> (%) | Controls, <i>n</i> (%) | OR (95% CI) <sup>1</sup> | GRE (95% CI)         | <i>P</i> -interaction <sup>2</sup> |
|------------------------------------|-------------------------|------------------------|--------------------------|----------------------|------------------------------------|
| <b>History of colonoscopy: no</b>  |                         |                        |                          |                      | 0.22                               |
| Healthy lifestyle score            |                         |                        |                          |                      |                                    |
| 0–2                                | 1,155 (32.6)            | 352 (22.4)             | Ref.                     | Ref.                 |                                    |
| 3                                  | 1,259 (35.5)            | 514 (32.8)             | 0.77 (0.65, 0.90)        | –19.9 (–32.9, –7.0)  |                                    |
| 4                                  | 878 (24.8)              | 483 (30.8)             | 0.58 (0.49, 0.69)        | –41.6 (–56.7, –26.5) |                                    |
| 5                                  | 250 (7.1)               | 219 (14.0)             | 0.38 (0.30, 0.48)        | –73.8 (–95.5, –52.2) |                                    |
| Per 1-point increase               |                         |                        | 0.76 (0.71, 0.80)        | –20.9 (–26.8, –15.1) |                                    |
| PRS (per 10 percentile increase)   |                         |                        | 1.14 (1.12, 1.17)        |                      |                                    |
| <b>History of colonoscopy: yes</b> |                         |                        |                          |                      |                                    |
| Healthy lifestyle score            |                         |                        |                          |                      |                                    |
| 0–2                                | 364 (28.6)              | 524 (22.1)             | Ref.                     | Ref.                 |                                    |
| 3                                  | 456 (35.8)              | 823 (34.7)             | 0.79 (0.66, 0.95)        | –20.8 (–37.7, –3.9)  |                                    |



Table S9 Continued

| Healthy lifestyle score           | CRC cases, <i>n</i> (%) | Controls, <i>n</i> (%) | OR (95% CI) <sup>1</sup> | GRE (95% CI)           | <i>P</i> -interaction <sup>2</sup> |
|-----------------------------------|-------------------------|------------------------|--------------------------|------------------------|------------------------------------|
| 4                                 | 355 (27.9)              | 692 (29.2)             | 0.71 (0.58, 0.86)        | -30.2 (-48.8, -11.6)   |                                    |
| 5                                 | 97 (7.6)                | 334 (14.1)             | 0.39 (0.30, 0.52)        | -83.1 (-113.9, -52.3)  |                                    |
| Per 1-point increase              |                         |                        | 0.81 (0.75, 0.86)        | -18.6 (-26.0, -11.2)   |                                    |
| PRS (per 10 percentile increase)  |                         |                        | 1.12 (1.09, 1.15)        |                        |                                    |
| <b>Use of NSAIDs: no</b>          |                         |                        |                          |                        | 0.55                               |
| Healthy lifestyle score           |                         |                        |                          |                        |                                    |
| 0-2                               | 1,039 (30.3)            | 503 (20.6)             | Ref.                     | Ref.                   |                                    |
| 3                                 | 1,197 (34.9)            | 803 (32.9)             | 0.77 (0.66, 0.90)        | -19.9 (-32.1, -7.8)    |                                    |
| 4                                 | 927 (27.0)              | 741 (30.4)             | 0.64 (0.55, 0.75)        | -34.1 (-47.4, -20.7)   |                                    |
| 5                                 | 264 (7.7)               | 392 (16.1)             | 0.36 (0.29, 0.45)        | -78.0 (-98.2, -57.8)   |                                    |
| Per 1-point increase              |                         |                        | 0.76 (0.72, 0.81)        | -20.9 (-26.3, -15.6)   |                                    |
| PRS (per 10 percentile increase)  |                         |                        | 1.14 (1.12, 1.16)        |                        |                                    |
| <b>Use of NSAIDs: yes</b>         |                         |                        |                          |                        |                                    |
| Healthy lifestyle score           |                         |                        |                          |                        |                                    |
| 0-2                               | 480 (34.6)              | 373 (24.8)             | Ref.                     | Ref.                   |                                    |
| 3                                 | 518 (37.3)              | 534 (35.6)             | 0.80 (0.65, 0.97)        | -19.7 (-38.0, -1.4)    |                                    |
| 4                                 | 306 (22.1)              | 434 (28.9)             | 0.61 (0.49, 0.76)        | -43.6 (-66.5, -20.7)   |                                    |
| 5                                 | 83 (6.0)                | 161 (10.7)             | 0.46 (0.33, 0.63)        | -68.5 (-102.5, -34.6)  |                                    |
| Per 1-point increase              |                         |                        | 0.80 (0.74, 0.87)        | -19.7 (-28.3, -11.1)   |                                    |
| PRS (per 10 percentile increase)  |                         |                        | 1.12 (1.08, 1.15)        |                        |                                    |
| <b>Family history of CRC: no</b>  |                         |                        |                          |                        | 0.0013                             |
| Healthy lifestyle score           |                         |                        |                          |                        |                                    |
| 0-2                               | 1,281(31.1)             | 801 (22.8)             | Ref.                     | Ref.                   |                                    |
| 3                                 | 1,449 (35.3)            | 1,192 (33.9)           | 0.80 (0.70, 0.91)        | -18.3 (-29.2, -7.3)    |                                    |
| 4                                 | 1,075 (26.2)            | 1,028 (29.3)           | 0.69 (0.60, 0.79)        | -30.4 (-42.6, -18.1)   |                                    |
| 5                                 | 305 (7.4)               | 491 (14.0)             | 0.42 (0.35, 0.51)        | -71.0 (-89.6, -52.4)   |                                    |
| Per 1-point increase              |                         |                        | 0.80 (0.76, 0.84)        | -18.3 (-23.0, -13.5)   |                                    |
| PRS (per 10 percentile increase)  |                         |                        | 1.13 (1.11, 1.15)        |                        |                                    |
| <b>Family history of CRC: yes</b> |                         |                        |                          |                        |                                    |
| Healthy lifestyle score           |                         |                        |                          |                        |                                    |
| 0-2                               | 238 (33.8)              | 75 (17.4)              | Ref.                     |                        |                                    |
| 3                                 | 266 (37.8)              | 145 (33.8)             | 0.61 (0.42, 0.87)        | -31.5 (-56.6, -6.4)    |                                    |
| 4                                 | 158 (22.4)              | 147 (34.3)             | 0.32 (0.22, 0.47)        | -72.6 (-105.1, -40.0)  |                                    |
| 5                                 | 42 (6.0)                | 62 (14.5)              | 0.20 (0.11, 0.33)        | -102.5 (-148.3, -56.7) |                                    |

Table S9 Continued

| Healthy lifestyle score          | CRC cases, <i>n</i> (%) | Controls, <i>n</i> (%) | OR (95% CI) <sup>1</sup> | GRE (95% CI)         | <i>P</i> -interaction <sup>2</sup> |
|----------------------------------|-------------------------|------------------------|--------------------------|----------------------|------------------------------------|
| Per 1-point increase             |                         |                        | 0.59 (0.51, 0.68)        | -33.6 (-47.0, -20.2) |                                    |
| PRS (per 10 percentile increase) |                         |                        | 1.17 (1.11, 1.23)        |                      |                                    |

<sup>1</sup>Variables in the model included healthy lifestyle scores, age, gender, education, family history of CRC, history of colonoscopy, participation in routine health check-ups, use of NSAIDs, and PRS (per 10 percentiles, continuous), but without the stratification factors. <sup>2</sup>Interactions were tested by inclusion of a cross-product term of the healthy lifestyle score (categorical variable) and stratification factors in the models. CI, confidence intervals; CRC, colorectal cancer; GRE, genetic risk equivalent; NSAID, nonsteroidal anti-inflammatory drug; OR, odds ratio; PRS, polygenic risk score; Ref., reference.
